# Supplementary material
Source: ML conference proceedings conference paper supplement (https://proceedings.mlr.press/v119/debenedetto20a.html)
Supplement: Supplementary file [file debenedetto20a-supp.pdf]

## A. Proof of Theorem 3

Our strategy is to form a Jordan decomposition of  $A$  and show that the desired bounds hold for each Jordan block. To this end, we first prove the following lemmas.

**Lemma 8.** *If  $J$  is a Jordan block with nonzero eigenvalue, then for any  $\epsilon > 0$  there is a complex matrix  $D$  such that  $J + D$  is diagonalizable in  $\mathbb{C}$  and*

$$\frac{\|(J + D)^n - J^n\|}{\|J^n\|} \leq n\epsilon.$$

*Proof.* The powers of  $J$  look like

$$J^n = \begin{bmatrix} \binom{n}{0}\lambda^n & \binom{n}{1}\lambda^{n-1} & \binom{n}{2}\lambda^{n-2} & \dots \\ & \binom{n}{0}\lambda^n & \binom{n}{1}\lambda^{n-1} & \dots \\ & & \binom{n}{0}\lambda^n & \dots \\ & & & \ddots \end{bmatrix}.$$

More concisely,

$$[J^n]_{jk} = \begin{cases} \binom{n}{k-j}\lambda^{n-k+j} & \text{if } 0 \leq k-j \leq n \\ 0 & \text{otherwise.} \end{cases}$$

We choose  $D$  to perturb the diagonal elements of  $J$  towards zero; that is, let  $D$  be a diagonal matrix whose elements are in  $[-\epsilon\lambda, 0)$  and are all different. This shrinks the diagonal elements by a factor no smaller than  $(1 - \epsilon)$ . So the powers of  $(J + D)$  are, for  $0 \leq k - j \leq n$ :

$$\begin{aligned} [(J + D)^n]_{jk} &= c_{jk} [J^n]_{jk} \\ c_{jk} &\geq (1 - \epsilon)^{n-k+j}. \end{aligned}$$

Simplifying the bound on  $c_{jk}$  (Kozma, 2019):

$$c_{jk} \geq 1 - (n - k + j)\epsilon \geq 1 - n\epsilon. \quad (4)$$

The elements of  $J^n$ , for  $0 \leq k - j \leq n$ , are perturbed by:

$$\begin{aligned} [(J + D)^n - J^n]_{jk} &= (c_{jk} - 1)[J^n]_{jk} \\ \left| [(J + D)^n - J^n]_{jk} \right| &\leq n\epsilon \left| [J^n]_{jk} \right|. \end{aligned}$$

Since  $\|\cdot\|$  is monotonic,

$$\begin{aligned} \|(J + D)^n - J^n\| &\leq n\epsilon \|J^n\| \\ \frac{\|(J + D)^n - J^n\|}{\|J^n\|} &\leq n\epsilon. \quad \square \end{aligned}$$

**Lemma 9.** *If  $J$  is a Jordan block with zero eigenvalue, then for any  $\epsilon > 0, r > 0$ , there is a complex matrix  $D$  such that  $J + D$  is diagonalizable in  $\mathbb{C}$  and*

$$\|(J + D)^n - J^n\| \leq r^n \epsilon.$$

*Proof.* Since the diagonal elements of  $J$  are all zero, we can't perturb them toward zero as in Lemma 8; instead, let

$$\delta = \min \left\{ \frac{r}{2}, \left( \frac{r}{2} \right)^d \frac{\epsilon}{d} \right\}$$

and let  $D$  be a diagonal matrix whose elements are in  $(0, \delta]$  and are all different. Then the elements of  $((J + D)^n - J^n)$  are, for  $0 \leq k - j < \min\{n, d\}$ :

$$\begin{aligned} [(J + D)^n - J^n]_{jk} &\leq \binom{n}{k-j} \delta^{n-k+j} \\ &< 2^n \delta^{n-k+j} \\ &\leq 2^n \delta^{\min\{0, n-d\}+1}, \end{aligned}$$

and by monotonicity,

$$\|(J + D)^n - J^n\| \leq 2^n \delta^{\min\{0, n-d\}+1} d.$$

To simplify this bound, we consider two cases. If  $n \leq d$ ,

$$\begin{aligned} \|(J + D)^n - J^n\| &= 2^n \delta d \\ &\leq 2^n \left( \frac{r}{2} \right)^d \frac{\epsilon}{d} d \\ &= 2^{n-d} r^d \epsilon \\ &\leq r^n \epsilon. \end{aligned}$$

If  $n > d$ ,

$$\begin{aligned} \|(J + D)^n - J^n\| &= 2^n \delta^{n-d+1} d \\ &\leq 2^n \delta^{n-d} \left( \frac{r}{2} \right)^d \frac{\epsilon}{d} d \\ &\leq 2^n \left( \frac{r}{2} \right)^{n-d} \left( \frac{r}{2} \right)^d \frac{\epsilon}{d} d \\ &= r^n \epsilon. \quad \square \end{aligned}$$

Now we can combine the above two lemmas to obtain the desired bounds for a general matrix.

*Proof of Theorem 3.* Form the Jordan decomposition  $A = PJP^{-1}$ , where

$$J = \begin{bmatrix} J_1 & & & \\ & J_2 & & \\ & & \ddots & \\ & & & J_p \end{bmatrix}$$

and each  $J_j$  is a Jordan block. Let  $\kappa(P) = \|P\| \|P^{-1}\|$  be the Frobenius condition number of  $P$ .

If  $A$  is nilpotent, use Lemma 9 on each block  $J_j$  to find a  $D_j$  so that  $\|(J_j + D_j)^n - J_j^n\| \leq \frac{r^n \epsilon}{\kappa(P)^p}$ . Combine the  $D_j$

into a single matrix  $D$ , so that  $\|(J + D)^n - J^n\| \leq \frac{r^n \epsilon}{\kappa(P)}$ . Let  $E = PDP^{-1}$ , and then

$$\begin{aligned} \|(A + E)^n - A^n\| &= \|P((J + D)^n - J^n)P^{-1}\| \\ &\leq \kappa(P)\|(J + D)^n - J^n\| \\ &\leq \kappa(P)\frac{r^n \epsilon}{\kappa(P)} \\ &= r^n \epsilon. \end{aligned}$$

If  $A$  is not nilpotent, then for each Jordan block  $J_j$ :

- If  $J_j$  has nonzero eigenvalue, use Lemma 8 to find a  $D_j$  such that  $\|(J_j + D_j)^n - J_j^n\| \leq \frac{n\epsilon}{\kappa(P)^2} \frac{\|J_j^n\|}{2^p}$ .
- If  $J_j$  has zero eigenvalue, use Lemma 9 to find a  $D_j$  such that  $\|(J_j + D_j)^n - J_j^n\| \leq \frac{n\epsilon}{\kappa(P)^2} \frac{\rho(J_j^n)}{2^p}$ .

Combine the  $D_j$  into a single matrix  $D$ . Then the total absolute error of all the blocks with nonzero eigenvalue is at most  $\frac{n\epsilon}{\kappa(P)^2} \frac{\|J^n\|}{2}$ . And since  $\rho(J^n) \leq \|J^n\|$ , the total absolute error of all the blocks with zero eigenvalue is also at most  $\frac{n\epsilon}{\kappa(P)^2} \frac{\|J^n\|}{2}$ . So the combined total is

$$\|(J + D)^n - J^n\| \leq \frac{n\epsilon}{\kappa(P)^2} \|J^n\|.$$

Finally, let  $E = PDP^{-1}$ , and

$$\begin{aligned} \|(A + E)^n - A^n\| &= \|P((J + D)^n - J^n)P^{-1}\| \\ &\leq \kappa(P)\|(J + D)^n - J^n\| \\ &\leq \frac{n\epsilon}{\kappa(P)} \|J^n\| \\ &\leq \frac{n\epsilon}{\kappa(P)} \|P^{-1}A^nP\| \\ &\leq n\epsilon \|A^n\| \\ \frac{\|(A + E)^n - A^n\|}{\|A^n\|} &\leq n\epsilon. \end{aligned}$$

## B. Proof of Proposition 5

First, consider the  $\oplus$  operation. Let  $\mu_1(a)$  (for all  $a$ ) be the transition matrices of  $M_1$ . For any  $\epsilon > 0$ , let  $E_1(a)$  be the perturbations of the  $\mu_1(a)$  such that  $\|E_1(a)\| \leq \epsilon/2$  and the  $\mu_1(a) + E_1(a)$  (for all  $a$ ) are simultaneously diagonalizable. Similarly for  $M_2$ . Then the matrices  $(\mu_1(a) + E_1(a)) \oplus (\mu_2(a) + E_2(a))$  (for all  $a$ ) are simultaneously diagonalizable, and

$$\begin{aligned} \|(\mu_1(a) + E_1(a)) \oplus (\mu_2(a) + E_2(a)) - \mu_1(a) \oplus \mu_2(a)\| \\ &= \|E_1(a) \oplus E_2(a)\| \\ &\leq \|E_1(a)\| + \|E_2(a)\| \\ &\leq \epsilon. \end{aligned}$$

Next, we consider the  $\sqcup$  operation. Let  $d_1$  and  $d_2$  be the number of states in  $M_1$  and  $M_2$ , respectively. Let  $E_1(a)$  be the perturbations of the  $\mu_1(a)$  such that  $\|E_1(a)\| \leq \epsilon/(2d_2)$  and the  $\mu_1(a) + E_1(a)$  are simultaneously diagonalizable by some matrix  $P_1$ . Similarly for  $M_2$ .

Then the matrices  $(\mu_1(a) + E_1(a)) \sqcup (\mu_2(a) + E_2(a))$  (for all  $a$ ) are simultaneously diagonalizable by  $P_1 \otimes P_2$ . To see why, let  $A_1 = \mu_1(a) + E_1(a)$  and  $A_2 = \mu_2(a) + E_2(a)$  and observe that

$$\begin{aligned} (P_1 \otimes P_2)(A_1 \sqcup A_2)(P_1 \otimes P_2)^{-1} \\ &= (P_1 \otimes P_2)(A_1 \otimes I + I \otimes A_2)(P_1^{-1} \otimes P_2^{-1}) \\ &= P_1 A_1 P_1^{-1} \otimes I + I \otimes P_2 A_2 P_2^{-1} \\ &= P_1 A_1 P_1^{-1} \sqcup P_2 A_2 P_2^{-1}, \end{aligned}$$

which is diagonal.

To show that  $(\mu_1(a) + E_1(a)) \sqcup (\mu_2(a) + E_2(a))$  is close to  $(\mu_1(a) \sqcup \mu_2(a))$ , observe that

$$\begin{aligned} (\mu_1(a) + E_1(a)) \sqcup (\mu_2(a) + E_2(a)) \\ &= (\mu_1(a) + E_1(a)) \otimes I + I \otimes (\mu_2(a) + E_2(a)) \\ &= \mu_1(a) \otimes I + E_1(a) \otimes I + I \otimes \mu_2(a) + I \otimes E_2(a) \\ &= (\mu_1(a) \sqcup \mu_2(a)) + (E_1(a) \sqcup E_2(a)). \end{aligned}$$

Therefore,

$$\begin{aligned} \|(\mu_1(a) + E_1(a)) \sqcup (\mu_2(a) + E_2(a)) - \mu_1(a) \sqcup \mu_2(a)\| \\ &= \|E_1(a) \sqcup E_2(a)\| \\ &= \|E_1(a) \otimes I + I \otimes E_2(a)\| \\ &\leq \|E_1(a) \otimes I\| + \|I \otimes E_2(a)\| \\ &\leq \|E_1(a)\|d_2 + d_1\|E_2(a)\| \\ &\leq \epsilon. \end{aligned}$$

## C. Proof of Proposition 7

Because any set of commuting matrices can be simultaneously triangularized by a change of basis, assume without loss of generality that  $M$ 's transition matrices are upper triangular, that is, there are no transitions from state  $q$  to state  $r$  where  $q > r$ .

Let  $M = (Q, \Sigma, \lambda, \mu, \rho)$ , and arbitrarily number the symbols of  $\Sigma$  as  $a_1, \dots, a_m$ . Note that  $M$  assigns the same weight to multiset  $w$  as it does to the sorted symbols of  $w$ . That is, we can compute the weight of  $w$  by summing over sequences of states  $q_0, \dots, q_m$  such that  $q_0$  is an initial state,  $q_m$  is a final state, and  $M$  can get from state  $q_{i-1}$  to  $q_i$  while reading  $a_i^k$ , where  $k$  is the number of occurrences of  $a_i$  in  $w$ .

For all  $a \in \Sigma, q, r \in Q$ , define  $M_{q,a,r}$  to be the automaton that assigns to  $a^k$  the same weight that  $M$  would go from

state  $q$  to state  $r$  while reading  $a^k$ . That is,

$$\begin{aligned} M_{q,a,r} &= (\lambda_{q,a,r}, \mu_{q,a,r}, \rho_{q,a,r}) \\ [\lambda_{q,a,r}]_q &= 1 \\ \mu_{q,a,r}(a) &= \mu(a) \\ [\rho_{q,a,r}]_r &= 1 \end{aligned}$$

and all other weights are zero.

Then we can build a multiset automaton equivalent to  $M$  by combining the  $M_{q,a,r}$  using the union and shuffle operations:

$$M' = \bigoplus_{\substack{q_0, \dots, q_m \in Q \\ q_0 \leq \dots \leq q_m}} \lambda_{q_0} M_{q_0, a_1, q_1} \sqcup \dots \sqcup M_{q_{m-1}, a_m, q_m} \rho_{q_m}$$

(where multiplying an automaton by a scalar means scaling its initial or final weight vector by that scalar). The  $M_{q,a,r}$  are unary, so by Proposition 5, the transition matrices of  $M'$  are ASD. Since  $M_{q,a,r}$  has  $r - q + 1$  states, the number of states in  $M'$  is

$$|Q'| = \sum_{q_0 \leq \dots \leq q_m} \prod_{i=1}^m (q_i - q_{i-1} + 1)$$

which we can find a closed-form expression for using generating functions. If  $p(z)$  is a polynomial, let  $[z^i](p(z))$  stand for “the coefficient of  $z^i$  in  $p$ .” Then

$$\begin{aligned} |Q'| &= [z^{d-1}] \left( \sum_{i=0}^{\infty} z^i \right) \left( \sum_{i=0}^{\infty} (i+1)z^i \right)^m \left( \sum_{i=0}^{\infty} z^i \right) \\ &= [z^{d-1}] \left( \frac{1}{1-z} \right) \left( \frac{1}{1-z} \right)^{2m} \left( \frac{1}{1-z} \right) \\ &= [z^{d-1}] \left( \frac{1}{1-z} \right)^{2m+2} \\ &= \binom{2m+d}{d-1}. \end{aligned}$$
